# Supplementary material for: Patterns of authorship on community health workers in low-and-middle-income countries: an analysis of publications (2012–2016)
Source: PubMed Central journal article supplement — BMJ Glob Health. 2018 May 9;3(3):e000797. doi: 10.1136/bmjgh-2018-000797 (PMC5950650; doi:10.1136/bmjgh-2018-000797), 2018-05-09
Supplement: bmjgh-2018-000797supp002.pdf [file bmjgh-2018-000797supp002.pdf]

Supplementary File 2: Country distribution of HIC lead (n=304) and last (n=350) authors

| Country        | Lead authors |              | Last authors |              |
|----------------|--------------|--------------|--------------|--------------|
|                | N            | % total pubs | N            | % total pubs |
| USA            | 197          | 65%          | 196          | 56%          |
| United Kingdom | 34           | 11%          | 59           | 17%          |
| Canada         | 20           | 7%           | 16           | 5%           |
| Australia      | 11           | 4%           | 11           | 3%           |
| Netherlands    | 11           | 4%           | 14           | 4%           |
| Japan          | 8            | 3%           | 9            | 3%           |
| Sweden         | 8            | 3%           | 15           | 4%           |
| Norway         | 5            | 2%           | 9            | 3%           |
| Belgium        | 3            | 1%           | 5            | 1%           |
| Switzerland    | 3            | 1%           | 8            | 2%           |
| Denmark        | 1            | 0.3%         | 2            | 0.5%         |
| Germany        | 1            | 0.3%         | 1            | 0.3%         |
| Ireland        | 1            | 0.3%         | 1            | 0.3%         |
| Italy          | 1            | 0.3%         | -            | -            |
| Spain          | -            | -            | 3            | 0.8%         |
| Portugal       | -            | -            | 1            | 0.3%         |
| <b>Total</b>   | <b>304</b>   | <b>100%</b>  | <b>350</b>   | <b>100%</b>  |
